# Supplementary material for: Predicting lethal courses in critically ill COVID-19 patients using a machine learning model trained on patients with non-COVID-19 viral pneumonia
Source: PubMed Central journal article supplement (PMC8225662; doi:10.1038/s41598-021-92475-7), 2021-06-24
Supplement: 41598_2021_92475_MOESM1_ESM.pdf [file 41598_2021_92475_MOESM1_ESM.pdf]

## Supplementary Information

### Model training parameter

| Parameter group       | Parameter                        | Range/Value | Full model value | Reduced model value |
|-----------------------|----------------------------------|-------------|------------------|---------------------|
| XGBoost               | max_depth                        | 2-4         | 3                | 3                   |
|                       | gamma                            | 0 – 5       | 1.472283         | 0.453242            |
|                       | min_child_weight                 | 0 - 10      | 2.501065         | 2.467975            |
|                       | max_delta_step                   | 0           | 0                | 0                   |
|                       | subsample                        | 0.8 – 1.0   | 0.971699         | 0.9072              |
|                       | colsample_bytree                 | 0.3 – 1.0   | 0.97187          | 0.488832            |
|                       | eta                              | 0.01 – 0.1  | 0.020001         | 0.029677            |
|                       | num_boost_round                  | 10 – 1000   | 979              | 390                 |
|                       | alpha                            | 0           | 0                | 0                   |
| lambda                | 1                                | 1           | 1                |                     |
| Bayesian optimization | Initial random exploration steps | 10          |                  |                     |
|                       | Optimization steps               | 100         |                  |                     |

**Supplementary Table 1: Parameters for XGBoost hyper-parameter tuning.** Shown are the hyper-parameter search ranges used to optimize the predictive performance of the prediction models using a Bayesian optimization approach and the resulting final model values.

Model calibration

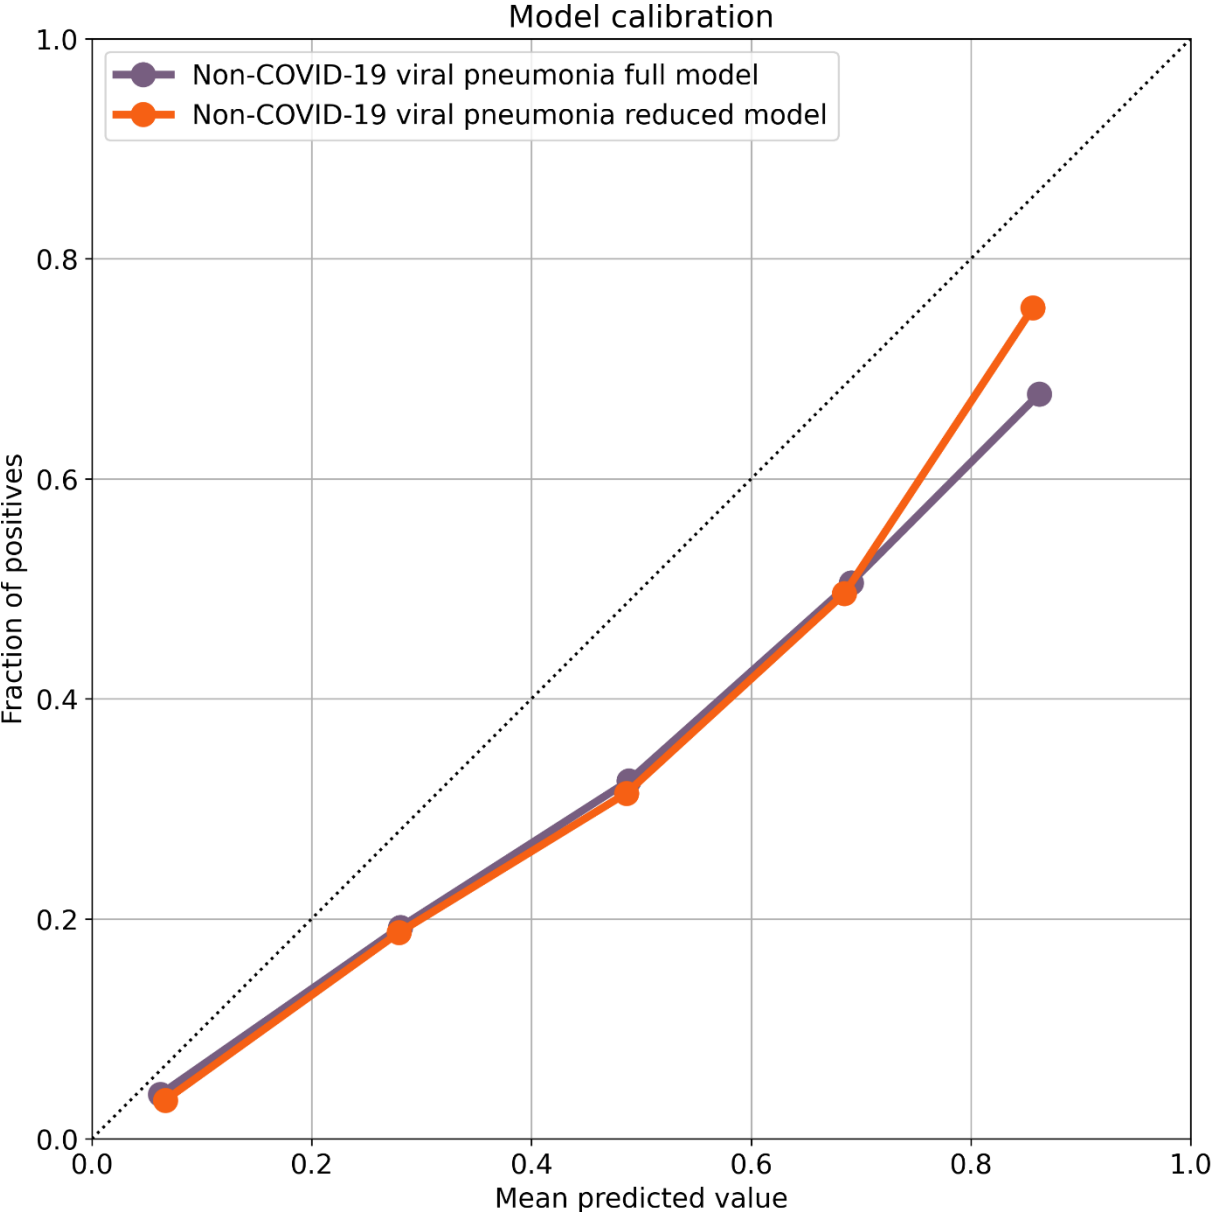

**Supplementary Figure 1: Model calibration.** Shown is the observed risk of death within the next 5 days (y axis) vs the mean predicted value of the non-COVID-19 viral pneumonia model trained on all features (purple) and the non-COVID-19 viral pneumonia reduced model trained on the top 20 features (orange). Dashed line indicates perfect calibration.

Full model feature list

| FEATURE                            | PERCENTILE | UNIT      | MEAN ABSOLUTE SHAP VALUE |
|------------------------------------|------------|-----------|--------------------------|
| VASOACTIVE INOTROPIC SCORE         | 0.5        |           | 0.21                     |
| THROMBOCYTES                       | 0.1        | /nl       | 0.21                     |
| AGE                                | 0.5        | a         | 0.19                     |
| HEART RATE                         | 0.1        | 1/min     | 0.17                     |
| NEUTROPHILS (%)                    | 0.1        | %         | 0.15                     |
| PULMONARY INFILTRATES              | 0.1        |           | 0.13                     |
| URINE OUTPUT                       | 0.5        | ml/d      | 0.10                     |
| RESPIRATORY RATE                   | 0.9        | 1/min     | 0.10                     |
| PH                                 | 0.5        |           | 0.10                     |
| P/F RATIO                          | 0.1        | mmHg      | 0.09                     |
| VENTILATION MODE                   | 0.1        |           | 0.09                     |
| MEAN ARTERIAL PRESSURE             | 0.1        | mmHg      | 0.08                     |
| PTT                                | 0.1        | s         | 0.08                     |
| VENTILATION PEAK PRESSURE          | 0.5        | mbar      | 0.07                     |
| RED BLOOD CELL DISTRIBUTION WIDTH  | 0.9        | %         | 0.07                     |
| VASOACTIVE INOTROPIC SCORE         | 0.9        |           | 0.07                     |
| ALANINE AMINOTRANSFERASE           | 0.1        | U/l       | 0.07                     |
| SODIUM                             | 0.9        | mmol/l    | 0.07                     |
| RED BLOOD CELL DISTRIBUTION WIDTH  | 0.1        | %         | 0.07                     |
| MONOCYTES (%)                      | 0.9        | %         | 0.07                     |
| VENTILATION PEAK PRESSURE          | 0.1        | mbar      | 0.07                     |
| PH                                 | 0.1        |           | 0.06                     |
| OXYGEN SATURATION                  | 0.1        | %         | 0.06                     |
| HEART RATE                         | 0.5        | 1/min     | 0.06                     |
| OXYGEN PARTIAL PRESSURE (ARTERIAL) | 0.5        | mmHg      | 0.05                     |
| THROMBOCYTES                       | 0.5        | /nl       | 0.05                     |
| INR-QUICK                          | 0.9        |           | 0.05                     |
| LACTATE DEHYDROGENASE              | 0.5        | U/l       | 0.05                     |
| HEIGHT                             | 0.5        | cm        | 0.05                     |
| VOLUME INTAKE                      | 0.5        | ml/h      | 0.05                     |
| METABOLIC DISORDERS                | 0.5        |           | 0.05                     |
| CARCINOMA                          | 0.5        |           | 0.05                     |
| EOSINOPHILS ABSOLUTE               | 0.1        | /nl       | 0.05                     |
| ANTIMYKOTICS APPLICATION           | 0.5        | 1/h       | 0.05                     |
| NOREPINEPHRINE                     | 0.1        | µg/kg/min | 0.05                     |
| ANTITHROMBIN III                   | 0.9        | %         | 0.05                     |
| TIDAL VOLUME                       | 0.1        | ml        | 0.04                     |
| LACTATE                            | 0.1        | mg/dl     | 0.04                     |
| LACTATE DEHYDROGENASE              | 0.1        | U/l       | 0.04                     |
| POTASSIUM                          | 0.9        | mmol/l    | 0.04                     |
| CUMULATIVE VOLUME INTAKE           | 0.5        | ml/h      | 0.04                     |
| CREATININE                         | 0.9        | mg/dl     | 0.04                     |

|                                           |     |                   |      |
|-------------------------------------------|-----|-------------------|------|
| <b>P-RISK SCORE</b>                       | 0.5 |                   | 0.04 |
| <b>OXYGEN PARTIAL PRESSURE (ARTERIAL)</b> | 0.9 | mmHg              | 0.04 |
| <b>P/F RATIO</b>                          | 0.5 | mmHg              | 0.04 |
| <b>THROMBOCYTES</b>                       | 0.9 | /nl               | 0.04 |
| <b>HEMOGLOBIN</b>                         | 0.9 | g/dl              | 0.04 |
| <b>CALCIUM</b>                            | 0.1 | mmol/l            | 0.04 |
| <b>CKMB</b>                               | 0.1 | U/l               | 0.04 |
| <b>P-RISK SCORE</b>                       | 0.1 |                   | 0.04 |
| <b>VENTILATION PEEP</b>                   | 0.9 | mbar              | 0.03 |
| <b>HEART RATE</b>                         | 0.9 | 1/min             | 0.03 |
| <b>RED BLOOD CELL DISTRIBUTION WIDTH</b>  | 0.5 | %                 | 0.03 |
| <b>HYPERTENSION</b>                       | 0.5 |                   | 0.03 |
| <b>VOLUME BALANCE</b>                     | 0.5 | ml/h              | 0.03 |
| <b>INR-QUICK</b>                          | 0.5 |                   | 0.03 |
| <b>TRIGLYCERIDE</b>                       | 0.9 | mg/dl             | 0.03 |
| <b>NEUTROPHILS ABSOLUTE</b>               | 0.1 | /nl               | 0.03 |
| <b>CK</b>                                 | 0.5 | U/l               | 0.03 |
| <b>ALBUMIN</b>                            | 0.9 | g/l               | 0.03 |
| <b>LEVOSIMENDAN</b>                       | 0.1 | µg/kg/min         | 0.03 |
| <b>P/F RATIO</b>                          | 0.9 | mmHg              | 0.03 |
| <b>ANTIBIOTICS APPLICATION</b>            | 0.5 | 1/h               | 0.03 |
| <b>D-DIMER</b>                            | 0.9 | mg/l              | 0.03 |
| <b>UREA</b>                               | 0.9 | mg/dl             | 0.03 |
| <b>VENTILATION PEEP</b>                   | 0.9 | mbar              | 0.03 |
| <b>C-REACTIVE PROTEIN</b>                 | 0.9 | mg/l              | 0.03 |
| <b>RESPIRATORY MINUTE VOLUME</b>          | 0.1 | l/min             | 0.03 |
| <b>D-DIMER</b>                            | 0.5 | mg/l              | 0.02 |
| <b>CD8 CELLS (%)</b>                      | 0.1 | %                 | 0.02 |
| <b>MYOGLOBIN</b>                          | 0.1 | µg/l              | 0.02 |
| <b>D-DIMER</b>                            | 0.1 | mg/l              | 0.02 |
| <b>NOREPINEPHRINE</b>                     | 0.9 | µg/kg/min         | 0.02 |
| <b>LACTATE</b>                            | 0.5 | mg/dl             | 0.02 |
| <b>PROCALCITONIN</b>                      | 0.9 | µg/l              | 0.02 |
| <b>CUMULATIVE VOLUME INTAKE</b>           | 0.5 | ml/d              | 0.02 |
| <b>BILIRUBIN</b>                          | 0.9 | mg/dl             | 0.02 |
| <b>C-REACTIVE PROTEIN</b>                 | 0.1 | mg/l              | 0.02 |
| <b>LUNG COMPLIANCE</b>                    | 0.9 | ml/mbar           | 0.02 |
| <b>BMI</b>                                | 0.5 | kg/m <sup>2</sup> | 0.02 |
| <b>CREATININE</b>                         | 0.1 | mg/dl             | 0.02 |
| <b>GLUCOSE</b>                            | 0.9 | mg/dl             | 0.02 |
| <b>GLUCOSE</b>                            | 0.5 | mg/dl             | 0.02 |
| <b>BICARBONATE</b>                        | 0.5 | mmol/l            | 0.02 |
| <b>DIASTOLIC BLOOD PRESSURE</b>           | 0.5 | mmHg              | 0.02 |
| <b>MONOCYTES ABSOLUTE</b>                 | 0.5 | /nl               | 0.02 |
| <b>ASPARTATE TRANSAMINASE</b>             | 0.1 | U/l               | 0.02 |
| <b>MONOCYTES (%)</b>                      | 0.1 | %                 | 0.02 |

|                                           |     |         |      |
|-------------------------------------------|-----|---------|------|
| <b>OXYGEN PARTIAL PRESSURE (ARTERIAL)</b> | 0.1 | mmHg    | 0.02 |
| <b>LEUKOCYTES</b>                         | 0.1 | /nl     | 0.02 |
| <b>BILIRUBIN</b>                          | 0.5 | mg/dl   | 0.02 |
| <b>P-RISK SCORE</b>                       | 0.9 |         | 0.02 |
| <b>MEAN ARTERIAL PRESSURE</b>             | 0.5 | mmHg    | 0.02 |
| <b>PTT</b>                                | 0.9 | s       | 0.02 |
| <b>CKMB</b>                               | 0.9 | U/l     | 0.02 |
| <b>VENTILATION PEEP</b>                   | 0.5 | mbar    | 0.02 |
| <b>LACTATE</b>                            | 0.9 | mg/dl   | 0.02 |
| <b>TRIGLYCERIDE</b>                       | 0.1 | mg/dl   | 0.02 |
| <b>VENTILATION PEAK PRESSURE</b>          | 0.1 | mbar    | 0.01 |
| <b>TIDAL VOLUME</b>                       | 0.5 | ml      | 0.01 |
| <b>NEUTROPHILS (%)</b>                    | 0.5 | %       | 0.01 |
| <b>UREA</b>                               | 0.1 | mg/dl   | 0.01 |
| <b>LACTATE DEHYDROGENASE</b>              | 0.9 | U/l     | 0.01 |
| <b>ASPARTATE TRANSAMINASE</b>             | 0.9 | U/l     | 0.01 |
| <b>MONOCYTES (%)</b>                      | 0.5 | %       | 0.01 |
| <b>MYOGLOBIN</b>                          | 0.5 | µg/l    | 0.01 |
| <b>LUNG COMPLIANCE</b>                    | 0.5 | ml/mbar | 0.01 |
| <b>CK</b>                                 | 0.1 | U/l     | 0.01 |
| <b>VENTILATION PEEP</b>                   | 0.5 | mbar    | 0.01 |
| <b>EOSINOPHILS ABSOLUTE</b>               | 0.9 | /nl     | 0.01 |
| <b>ANTITHROMBIN III</b>                   | 0.1 | %       | 0.01 |
| <b>CALCIUM</b>                            | 0.5 | mmol/l  | 0.01 |
| <b>BODY TEMPERATURE</b>                   | 0.9 | °C      | 0.01 |
| <b>RESPIRATORY MINUTE VOLUME</b>          | 0.9 | l/min   | 0.01 |
| <b>EOSINOPHILS (%)</b>                    | 0.9 | %       | 0.01 |
| <b>CK</b>                                 | 0.9 | U/l     | 0.01 |
| <b>STROKE</b>                             | 0.5 |         | 0.01 |
| <b>VASOACTIVE INOTROPIC SCORE</b>         | 0.1 |         | 0.01 |
| <b>GLUCOSE</b>                            | 0.1 | mg/dl   | 0.01 |
| <b>SYSTOLIC BLOOD PRESSURE</b>            | 0.9 | mmHg    | 0.01 |
| <b>TRIGLYCERIDE</b>                       | 0.5 | mg/dl   | 0.01 |
| <b>TIDAL VOLUME</b>                       | 0.9 | ml      | 0.01 |
| <b>INR-QUICK</b>                          | 0.1 |         | 0.01 |
| <b>RESPIRATORY RATE</b>                   | 0.5 | 1/min   | 0.01 |
| <b>EOSINOPHILS (%)</b>                    | 0.1 | %       | 0.01 |
| <b>ANTITHROMBIN III</b>                   | 0.5 | %       | 0.01 |
| <b>PROCALCITONIN</b>                      | 0.5 | µg/l    | 0.01 |
| <b>SODIUM</b>                             | 0.1 | mmol/l  | 0.01 |
| <b>ALBUMIN</b>                            | 0.1 | g/l     | 0.01 |
| <b>BASE EXCESS</b>                        | 0.1 | mmol/l  | 0.01 |
| <b>EOSINOPHILS ABSOLUTE</b>               | 0.5 | /nl     | 0.01 |
| <b>VENTILATION PEEP</b>                   | 0.1 | mbar    | 0.01 |
| <b>OXYGEN SATURATION</b>                  | 0.5 | %       | 0.01 |
| <b>SODIUM</b>                             | 0.5 | mmol/l  | 0.01 |

|                                        |     |           |      |
|----------------------------------------|-----|-----------|------|
| RESPIRATORY RATE                       | 0.1 | 1/min     | 0.01 |
| VENTILATION PEAK PRESSURE              | 0.9 | mbar      | 0.01 |
| NEUTROPHILS (%)                        | 0.9 | %         | 0.01 |
| MONOCYTES ABSOLUTE                     | 0.1 | /nl       | 0.01 |
| MONOCYTES ABSOLUTE                     | 0.9 | /nl       | 0.01 |
| LYMPHOCYTES (%)                        | 0.9 | %         | 0.01 |
| VENTILATION PEAK PRESSURE              | 0.5 | mbar      | 0.01 |
| PROCALCITONIN                          | 0.1 | µg/l      | 0.01 |
| ALBUMIN                                | 0.5 | g/l       | 0.01 |
| CD4 CELLS ABSOLUTE                     | 0.5 | /nl       | 0.01 |
| EPINEPHRINE                            | 0.5 | µg/kg/min | 0.01 |
| PULMONARY INFILTRATES<br>(PROGRESSIVE) | 0.9 |           | 0.01 |
| END TIDAL CO2                          | 0.5 | mmHg      | 0.01 |
| FIO2                                   | 0.1 | %         | 0.01 |
| BILIRUBIN                              | 0.1 | mg/dl     | 0.01 |
| ASPARTATE TRANSAMINASE                 | 0.5 | U/l       | 0.01 |
| CARBON DIOXIDE PARTIAL<br>PRESSURE     | 0.1 | mmHg      | 0.01 |
| END TIDAL CO2                          | 0.1 | mmHg      | 0.01 |
| NEUTROPHILS ABSOLUTE                   | 0.9 | /nl       | 0.01 |
| SYSTOLIC BLOOD PRESSURE                | 0.5 | mmHg      | 0.01 |
| TROPONIN                               | 0.1 | ng/l      | 0.01 |
| SYSTOLIC BLOOD PRESSURE                | 0.1 | mmHg      | 0.01 |
| PH                                     | 0.9 |           | 0.01 |
| DIURESIS                               | 0.1 | ml/h      | 0.01 |
| LEUKOCYTES                             | 0.5 | /nl       | 0.01 |
| WEIGHT                                 | 0.5 | kg        | 0.01 |
| VENTILATION PEAK PRESSURE              | 0.9 | mbar      | 0.01 |
| HEMOGLOBIN                             | 0.5 | g/dl      | 0.01 |
| BILIRUBIN DIREKT                       | 0.1 | mg/dl     | 0.01 |
| PULMONARY INFILTRATES<br>(BILATERAL)   | 0.9 |           | 0.01 |
| MYOGLOBIN                              | 0.9 | µg/l      | 0.01 |
| PULMONARY INFILTRATES                  | 0.5 |           | 0.00 |
| DIASTOLIC BLOOD PRESSURE               | 0.1 | mmHg      | 0.00 |
| BPS                                    | 0.5 |           | 0.00 |
| BPS                                    | 0.9 |           | 0.00 |
| CARBON DIOXIDE PARTIAL<br>PRESSURE     | 0.9 | mmHg      | 0.00 |
| PULMONARY INFILTRATES<br>(BILATERAL)   | 0.5 |           | 0.00 |
| TROPONIN                               | 0.5 | ng/l      | 0.00 |
| CD4 CELLS (%)                          | 0.9 | %         | 0.00 |
| BILIRUBIN DIREKT                       | 0.9 | mg/dl     | 0.00 |
| C-REACTIVE PROTEIN                     | 0.5 | mg/l      | 0.00 |
| BASE EXCESS                            | 0.9 | mmol/l    | 0.00 |
| EPINEPHRINE                            | 0.1 | µg/kg/min | 0.00 |

|                                 |     |           |      |
|---------------------------------|-----|-----------|------|
| PTT                             | 0.5 | s         | 0.00 |
| URINE OUTPUT                    | 0.5 | ml/h      | 0.00 |
| HEMOGLOBIN                      | 0.1 | g/dl      | 0.00 |
| LEUKOCYTES                      | 0.9 | /nl       | 0.00 |
| DELIRIUM                        | 0.1 |           | 0.00 |
| VENTILATION PEEP                | 0.1 | mbar      | 0.00 |
| CHRONIC KIDNEY DISEASES         | 0.5 |           | 0.00 |
| FERRITIN                        | 0.9 | µg/l      | 0.00 |
| NOREPINEPHRINE                  | 0.5 | µg/kg/min | 0.00 |
| DIASTOLIC BLOOD PRESSURE        | 0.9 | mmHg      | 0.00 |
| DELIRIUM                        | 0.5 |           | 0.00 |
| BICARBONATE                     | 0.9 | mmol/l    | 0.00 |
| BODY TEMPERATURE                | 0.1 | °C        | 0.00 |
| LUNG COMPLIANCE                 | 0.1 | ml/mbar   | 0.00 |
| UREA                            | 0.5 | mg/dl     | 0.00 |
| ALANINE AMINOTRANSFERASE        | 0.5 | U/l       | 0.00 |
| LYMPHOCYTES (%)                 | 0.1 | %         | 0.00 |
| LEVOSIMENDAN                    | 0.5 | µg/kg/min | 0.00 |
| EOSINOPHILS (%)                 | 0.5 | %         | 0.00 |
| BILIRUBIN DIREKT                | 0.5 | mg/dl     | 0.00 |
| POTASSIUM                       | 0.1 | mmol/l    | 0.00 |
| DIURESIS                        | 0.9 | ml/h      | 0.00 |
| CKMB                            | 0.5 | U/l       | 0.00 |
| DELIRIUM                        | 0.9 |           | 0.00 |
| BASE EXCESS                     | 0.5 | mmol/l    | 0.00 |
| DIURESIS                        | 0.5 | ml/h      | 0.00 |
| OXYGEN SATURATION               | 0.9 | %         | 0.00 |
| POTASSIUM                       | 0.5 | mmol/l    | 0.00 |
| ALANINE AMINOTRANSFERASE        | 0.9 | U/l       | 0.00 |
| CALCIUM                         | 0.9 | mmol/l    | 0.00 |
| PULMONARY HYPERTENSION          | 0.5 |           | 0.00 |
| CARBON DIOXIDE PARTIAL PRESSURE | 0.5 | mmHg      | 0.00 |
| CUMULATIVE VOLUME BALANCE       | 0.5 | ml/d      | 0.00 |
| LYMPHOCYTES (%)                 | 0.5 | %         | 0.00 |
| BODY TEMPERATURE                | 0.5 | °C        | 0.00 |
| FIO2                            | 0.5 | %         | 0.00 |
| END TIDAL CO2                   | 0.9 | mmHg      | 0.00 |
| VENTILATION MODE                | 0.5 |           | 0.00 |
| NEUTROPHILS ABSOLUTE            | 0.5 | /nl       | 0.00 |
| CARDIOVASCULAR DISEASES         | 0.5 |           | 0.00 |
| CORTICOIDS APPLICATION          | 0.5 | 1/h       | 0.00 |
| CREATININE                      | 0.5 | mg/dl     | 0.00 |
| BICARBONATE                     | 0.1 | mmol/l    | 0.00 |
| LYMPHOCYTES ABSOLUTE            | 0.9 | /nl       | 0.00 |
| EPINEPHRINE                     | 0.9 | µg/kg/min | 0.00 |
| VASOPRESSIN                     | 0.9 | E/kg/h    | 0.00 |

|                                     |     |           |      |
|-------------------------------------|-----|-----------|------|
| DOBUTAMINE                          | 0.9 | µg/kg/min | 0.00 |
| ENOXIMONE                           | 0.9 | µg/kg/min | 0.00 |
| LEVOSIMENDAN                        | 0.9 | µg/kg/min | 0.00 |
| CD4 CELLS ABSOLUTE                  | 0.1 | /nl       | 0.00 |
| CD8 CELLS (%)                       | 0.9 | %         | 0.00 |
| ENOXIMONE                           | 0.1 | µg/kg/min | 0.00 |
| DOBUTAMINE                          | 0.1 | µg/kg/min | 0.00 |
| VASOPRESSIN                         | 0.1 | E/kg/h    | 0.00 |
| CD8 CELLS ABSOLUTE                  | 0.9 | /nl       | 0.00 |
| CD4 CELLS ABSOLUTE                  | 0.9 | /nl       | 0.00 |
| PULMONARY INFILTRATES (BILATERAL)   | 0.1 |           | 0.00 |
| PULMONARY INFILTRATES (PROGRESSIVE) | 0.1 |           | 0.00 |
| TROPONIN                            | 0.9 | ng/l      | 0.00 |
| BPS                                 | 0.1 |           | 0.00 |
| FERRITIN                            | 0.5 | µg/l      | 0.00 |
| VENTILATION MODE                    | 0.9 |           | 0.00 |
| CD4 CELLS (%)                       | 0.1 | %         | 0.00 |
| FIO2                                | 0.9 | %         | 0.00 |
| MEAN ARTERIAL PRESSURE              | 0.9 | mmHg      | 0.00 |
| CD8 CELLS (%)                       | 0.5 | %         | 0.00 |
| CD8 CELLS ABSOLUTE                  | 0.5 | /nl       | 0.00 |
| CD4 CELLS (%)                       | 0.5 | %         | 0.00 |
| ENOXIMONE                           | 0.5 | µg/kg/min | 0.00 |
| DOBUTAMINE                          | 0.5 | µg/kg/min | 0.00 |
| VASOPRESSIN                         | 0.5 | E/kg/h    | 0.00 |
| SEX                                 | 0.5 |           | 0.00 |
| RESPIRATORY MINUTE VOLUME           | 0.5 | l/min     | 0.00 |
| PULMONARY INFILTRATES (PROGRESSIVE) | 0.5 |           | 0.00 |
| PULMONARY FIBROSIS                  | 0.5 |           | 0.00 |
| OBESITY                             | 0.5 |           | 0.00 |
| MALNUTRITION                        | 0.5 |           | 0.00 |
| LUNG DISEASES                       | 0.5 |           | 0.00 |
| LYMPHOCYTES ABSOLUTE                | 0.5 | /nl       | 0.00 |
| CORONARY HEART DISEASE              | 0.5 |           | 0.00 |
| COPD                                | 0.5 |           | 0.00 |
| PULMONARY INFILTRATES               | 0.9 |           | 0.00 |
| ASTHMA                              | 0.5 |           | 0.00 |
| FERRITIN                            | 0.1 | µg/l      | 0.00 |
| LYMPHOCYTES ABSOLUTE                | 0.1 | /nl       | 0.00 |
| CD8 CELLS ABSOLUTE                  | 0.1 | /nl       | 0.00 |
| DIABETES                            | 0.5 |           | 0.00 |

**Supplementary Table 2: Full model feature list and importances in training data set.** Shown are the features of the full model together with their importances as quantified by mean absolute SHAP values on the training dataset. For P Risk score, see **Supplementary Table 3**.



P-Risk score

| <b>Condition</b>                                                                                                                    | <b>Score</b> |
|-------------------------------------------------------------------------------------------------------------------------------------|--------------|
| Completely independently mobile or mostly independently mobile with no pressure ulcer present                                       | 0            |
| Completely independently mobile or mostly independently mobile with pressure ulcer present or partially (~50%) independently mobile | 1            |
| Only marginally independently mobile or not independently mobile                                                                    | 2            |
| Only marginally independently mobile or not independently mobile with continuous norepinephrine application                         | 3            |

**Supplementary Table 3: P-Risk Score.** *The P-Risk Score is a score to measure the risk to develop pressure ulcer primarily based on an assessment of the patient's mobility. Shown are the conditions associated with the respective values of the P-Risk-Score.*
